# Supplementary material
Source: PubMed Central journal article supplement (PMC4993686)
Supplement: NIHMS773933-supplement-SuppTable1.pdf [file NIHMS773933-supplement-SuppTable1.pdf]

## Supplementary Table 1:

**Supplementary Table 1: Clinical characteristics of cartilage specimens**

| <b>Cartilage Specimen</b> | <b>Age of Donor</b> | <b>Gender</b> | <b>Source of cartilage</b>                    |
|---------------------------|---------------------|---------------|-----------------------------------------------|
| Allograft #1              | 16                  | M             | Femur (Joint Restoration Foundation)          |
| Allograft #2              | 19                  | M             | Femur (Joint Restoration Foundation)          |
| Allograft #3              | 30                  | M             | Femur (Joint Restoration Foundation)          |
| Allograft #4              | 18                  | M             | Femur (Joint Restoration Foundation)          |
| Allograft #5              | 17                  | F             | Femur (Musculoskeletal Transplant Foundation) |
| Allograft #6              | 20                  | M             | Talus (Joint Restoration Foundation)          |
| Allograft #7              | 22                  | M             | Humerus (Joint Restoration Foundation)        |
| Allograft #8              | 22                  | M             | Femur (Joint Restoration Foundation)          |
| Allograft #9              | 33                  | M             | Femur (Joint Restoration Foundation)          |
| Allograft #10             | 18                  | M             | Femur (Joint Restoration Foundation)          |
| Allograft #11             | 31                  | M             | Femur (Joint Restoration Foundation)          |
| Allograft #12             | 33                  | F             | Talus (Joint Restoration Foundation)          |
| Allograft #13             | 15                  | M             | Femur (Joint Restoration Foundation)          |
| Allograft #14             | 33                  | M             | Femur (Musculoskeletal Transplant Foundation) |
| Allograft #15             | 25                  | M             | Femur (Joint Restoration Foundation)          |
| Fresh cartilage #1        | 68                  | F             | Femur (Knee arthroplasty)                     |
| Fresh cartilage #2        | 52                  | F             | Femur (Knee arthroplasty)                     |
| Fresh cartilage #3        | 21                  | M             | Tibia (Amputation tumor resection)            |
| Fresh cartilage #4        | 19                  | M             | Femur (Amputation tumor resection)            |
| Fresh cartilage #5        | 81                  | M             | Femur (Knee arthroplasty)                     |
| Fresh cartilage #6        | 58                  | M             | Talus (Amputation ischemia)                   |
| Fresh cartilage #7        | 27                  | M             | Femur (Amputation trauma)                     |
| Fresh cartilage #8        | 16                  | M             | Femur (Amputation tumor resection)            |
| Fresh cartilage #9        | 33                  | F             | Femur (Amputation tumor resection)            |
| Fresh cartilage #10       | 70                  | F             | Femur (Knee arthroplasty)                     |
