# Supplementary material
Source: PubMed Central journal article supplement (PMC4993686)
Supplement: NIHMS773933-supplement-SuppTable2.pdf [file NIHMS773933-supplement-SuppTable2.pdf]

## Supplementary Table 2:

Supplementary Table 2: Human RT-qPCR primer sequences used in this study

| NCBI*<br>Accession No. | Official<br>Symbol | Forward Primer            | Reverse Primer         |
|------------------------|--------------------|---------------------------|------------------------|
| NM_005252.3            | FOS                | GAGAATCCGAAGGAAAGGAAT     | TCCGCTTGGAGTGTATCAGTCA |
| NM_006732.2            | FOSB               | GCTGCAAGATCCCCTACGAAG     | ACGAAGAAGTGTACGAAGGGTT |
| NM_005438.3            | FOSL1              | CTTGTGAACAGATCAGCCCG      | TCCAGTTTGTAGTCTCCGC    |
| NM_005253.3            | FOSL2              | ATCCCGGAACTTTGACACC       | CGGAATTTCTGCTGGCCG     |
| NM_00222.3             | JUN                | AGTCCCAGGAGCGGATCAA       | TTCCTTTTTCGGCACTTGGA   |
| NM_002229.2            | JUNB               | TGGCCCAGCTCAAACAGAAG      | CAGAAGGCGTGTCCCTTGAC   |
| NM_005354.5            | JUND               | GTGAAGACCCTCAAGAGTCAGA    | GACGTGGCTGAGGACTTTCT   |
| NM_001964.2            | EGR1               | ACCCCTCTGTCTACTATTAAGGC   | TGGGACTGGTAGCTGGTATTG  |
| NM_001136177.1         | EGR2               | ATTCTGAGGCCCTCGCAAGTA     | GCTTATGCCAGTGTGGATT    |
| NM_004430.2            | EGR3               | GCGACCTCTACTCAGAGCC       | CTTGGCCGATTGGTAATCCTG  |
| NM_002467.4            | MYC                | CGGATTCTCTGCTCTCCTCGAC    | CCTCCAGCAGAAGGTGATCCA  |
| NM_033326.3            | SOX6               | GGATGCAATGACCCAGGATTT     | TGAATGGTACTGACAAGTGTGG |
| NM_000346.3            | SOX9               | TGTATCACTGAGTCATTTGCAGTGT | AAGGTCTGTCAGTGGGCTGAT  |
| NM_000088.3            | COL1A1             | GTAACAGCGGTGAACCTGG       | CCTCGCTTTCCTTCTCTCC    |
| NM_001844.4            | COL2A1             | GGGATCGTGGTGACAAAAGGT     | CTGGGCAGCAAAGTTTCCAC   |
| NM_000493.3            | COL10A1            | AAGAATGGCACCCCTGTAATGT    | ACTCCCTGAAGCTGATCCA    |
| NM_013227.3            | ACAN               | GTGCCTATCAGGACAAGGTCT     | GATGCCTTTCACCACGACTTC  |
| NM_001920.3            | DCN                | ATGAAGGCCACTATCATCTCC     | GTCGCGGTCATCAGGAACCTT  |
| NM_001884.3            | HAPLN1             | TCTGGTGCTGATTTCAATCTGC    | TGCTTGGATGTGAATAGCTCTG |
| NM_002160.3            | TNC                | AGGGCAAGTGCCTAAATGGAG     | TGGGCAGATTTACGGCTG     |
| NM_000095.2            | COMP               | AAGAACGACGACCAAAAGGAC     | CATCCCCTATACCATCGCCA   |
| NM_005163.2            | AKT1               | ATGGCGCTGAGATTGTGTCA      | CCCGGTACACCACGTTCTTC   |
